# Supplementary material
Source: Frontiers journal article supplement (https://www.frontiersin.org/articles/317588)
Supplement: Table_4.pdf [file Table_4.pdf]

**SUPPLEMENTARY TABLE S4** | Number of mOTUs from sugarcane organs recovered by the sugarcane CBC. Recovery estimates of mOTUs for roots, stalks (bottom, medium and upper) and leaves were calculated by cross-referencing the mOTUs (based on the culture-independent microbiome profile) with the cOTUs of the sugarcane CBC (based on the culture-dependent profile). End, endophytic; Exo, exophytic.

| Sugarcane organ   | Core microbiome |             | Non-core microbiome |             |
|-------------------|-----------------|-------------|---------------------|-------------|
|                   | <i>mOTU</i>     | <i>cOTU</i> | <i>mOTU</i>         | <i>cOTU</i> |
| Bulk soil         | 173             | 100         | 87                  | 56          |
| Rhizosphere       | 128             | 75          | 164                 | 99          |
| End. root         | 133             | 79          | 164                 | 100         |
| End. young shoot  | 104             | 62          | 195                 | 111         |
| End. bottom stalk | 66              | 48          | 208                 | 113         |
| End. medium stalk | 56              | 40          | 185                 | 109         |
| End. upper stalk  | 48              | 33          | 200                 | 114         |
| End. leaf         | 31              | 26          | 186                 | 102         |
| Exo. bottom stalk | 83              | 58          | 230                 | 121         |
| Exo. medium stalk | 45              | 33          | 249                 | 131         |
| Exo. upper stalk  | 40              | 29          | 222                 | 121         |
| Exo. leaf         | 63              | 46          | 207                 | 116         |
